# Supplementary material for: Dry Eye Disease and Tear Cytokine Levels—A Meta-Analysis
Source: Int J Mol Sci. 2020 Apr 28;21(9):3111. doi: 10.3390/ijms21093111 (PMC7246678; doi:10.3390/ijms21093111)
Supplement: Supplementary file 1 [file ijms-21-03111-s001.pdf]

**Table 3.** Summary of data from the meta-analysis, containing for each cytokine the calculation of heterogeneity among controls, the heterogeneity among DED, and the random effect meta-analyses, subdivided between Multiplex and ELISA techniques.

[illegible]
